# Supplementary material for: Transcutaneous vagus nerve stimulation (t-VNS): A novel effective treatment for temper outbursts in adults with Prader-Willi Syndrome indicated by results from a non-blind study
Source: PLoS One. 2019 Dec 3;14(12):e0223750. doi: 10.1371/journal.pone.0223750 (PMC6890246; doi:10.1371/journal.pone.0223750)
Supplement: S9 Appendix — (XLSX) [file pone.0223750.s009.xlsx]

## Sheet: 003
		Phase	Number of Temper outbursts
		Baseline	1
		Baseline	1
		Baseline	0
		Baseline	0
		Baseline	0
		Baseline	0
		Baseline	0
		Baseline	0
		Baseline	0
		Baseline	0
		Baseline	0
		Baseline	0
		Baseline	0
		Baseline	0
		Baseline	0
		Baseline	0
		Baseline	0
		Baseline	0
		Baseline	0
		Baseline	0
		Baseline	0
		Baseline	0
		Baseline	0
		Baseline	0
		Baseline	0
		Baseline	0
		Baseline	0
		Baseline	0
		Baseline	1
		Baseline	1
		Baseline	0
		Baseline	0
		Baseline	1
		Baseline	0
		Baseline	0
		Baseline	0
		Baseline	0
		Baseline	0
		Baseline	0
		Baseline	0
		Baseline	0
		Baseline	0
		Baseline	0
		Baseline	0
		Baseline	0
		Baseline	0
		Baseline	0
		Baseline	0
		Baseline	0
		Baseline	0
		Baseline	0
		Baseline	0
		Baseline	0
		Baseline	1
		Baseline	1
		Baseline	0
		Baseline	1
		Baseline	0
		Baseline	0
		Baseline	0
		Baseline	0
		Baseline	0
		Baseline	0
		Baseline	0
		Baseline	0
		Baseline	0
		Baseline	0
		Baseline	0
		Baseline	0
		Baseline	0
		Baseline	0
		Baseline	1
		Baseline	0
		Baseline	0
		Baseline	1
		Baseline	0
		Baseline	0
		Baseline	0
		Baseline	0
		Baseline	1
		Baseline	0
		Baseline	0
		Baseline	0
		Baseline	0
		Baseline	0
		Baseline	0
		Baseline	0
		Baseline	0
		Baseline	0
		Baseline	0
		Baseline	0
		Baseline	0
		Baseline	0
		Baseline	0
		Baseline	0
		Baseline	0
		Baseline	0
		Baseline	0
		Baseline	0
		Baseline	0
		Baseline	0
		Baseline	0
		Baseline	0
		Baseline	0
		Baseline	0
		Baseline	0
		Baseline	0
		Baseline	0
		Baseline	0
		Baseline	0
		Baseline	0
		Baseline	0
		Baseline	0
		Baseline	0
		Baseline	0
		Baseline	0
		Baseline	0
		Baseline	0
		Baseline	0
		Baseline	0
		Baseline	0
		Baseline	0
		Baseline	0
		Baseline	0
		Baseline	0
		Baseline	0
		Baseline	0
		Baseline	0
		Baseline	0
		Baseline	0
		Baseline	0
		Baseline	0
		Baseline	0
		Baseline	1
		Baseline	1
		Baseline	0
		Baseline	0
		Baseline	0
		Baseline	0
		Baseline	0
		Baseline	1
		Baseline	0
		Baseline	0
		Baseline	0
		Baseline	0
		Baseline	0
		Baseline	0
		Baseline	0
		Baseline	0
		Baseline	0
		Baseline	0
		Baseline	0
		Baseline	0
		Baseline	0
		Baseline	1
		Baseline	1
		Baseline	1
		Baseline	0
		Baseline	0
		Baseline	0
		Baseline	0
		Baseline	1
		Baseline	0
		Baseline	0
		Baseline	0
		Baseline	0
		Baseline	0
		Baseline	0
		Baseline	1
		Baseline	1
		Baseline	0
		Baseline	0
		Baseline	0
		Baseline	1
		Baseline	0
		Baseline	0
		Baseline	0
		Baseline	0
		Baseline	0
		Baseline	0
		Baseline	0
		Baseline	1
		Baseline	0
		Baseline	0
		Baseline	0
		Baseline	0
		Baseline	0
		Baseline	0
		Baseline	0
		Baseline	0
		Baseline	0
		Baseline	0
		Baseline	0
		Baseline	0
		Baseline	0
		Baseline	0
		Baseline	0
		Baseline	0
		Baseline	0
		Baseline	1
		Baseline	1
		Baseline	0
		Baseline	0
		Baseline	1
		Baseline	0
		Baseline	0
		Baseline	0
		Baseline	0
		Baseline	0
		Baseline	0
		Baseline	0
		Baseline	0
		Baseline	0
		Baseline	0
		Baseline	0
		Baseline	0
		Baseline	0
		Baseline	0
		Baseline	0
		Baseline	0
		Baseline	0
		Baseline	0
		Baseline	1
		Baseline	0
		Baseline	0
		Baseline	0
		Baseline	0
		Baseline	0
		Baseline	0
		Baseline	0
		Baseline	0
		Baseline	0
		Baseline	0
		Baseline	1
		Baseline	0
		Baseline	0
		Baseline	0
		Baseline	0
		Baseline	0
		Baseline	0
		Baseline	0
		Baseline	0
		Baseline	0
		Baseline	0
		Baseline	0
		A1	0
		A1	0
		A1	0
		A1	0
		A1	0
		A1	0
		A1	0
		A1	1
		A1	0
		A1	0
		A1	1
		A1	0
		A1	0
		A1	1
		A1	0
		A1	0
		A1	0
		A1	0
		A1	1
		A1	0
		A1	0
		A1	0
		A1	0
		A1	0
		A1	1
		A1	0
		A1	0
		A1	0
		A1	0
		A1	0
		A1	1
		A1	0
		A1	0
		A1	0
		A1	0
		A1	0
		A1	0
		A1	0
		A1	0
		A1	1
		A1	0
		A1	0
		A1	0
		A1	0
		A1	0
		A1	0
		A1	0
		A1	0
		A1	0
		A1	0
		A1	1
		A1	0
		A1	0
		A1	0
		A1	0
		A1	0
		A1	0
		A1	0
		A1	0
		A1	0
		A1	1
		A1	0
		A1	0
		A1	0
		A1	0
		A1	0
		A1	0
		A1	0
		A1	0
		A1	0
		A1	1
		A1	0
		A1	1
		A1	0
		A1	0
		A1	0
		A1	0
		A1	0
		A1	0
		A1	0
		A1	0
		A1	0
		A1	0
		A1	0
		A1	1
		A1	0
		A1	0
		A1	0
		A1	1
		A1	0
		A2	0
		A2	0
		A2	0
		A2	0
		A2	0
		A2	0
		A2	0
		A2	0
		A2	0
		A2	0
		A2	0
		A2	0
		A2	0
		A2	0
		A2	0
		A2	0
		A2	0
		A2	0
		A2	0
		A2	0
		A2	0
		A2	0
		A2	0
		A2	0
		A2	0
		A2	0
		A2	0
		A2	1
		A2	0
		A2	0
		A2	0
		A2	0
		A2	0
		A2	0
		A2	0
		A2	0
		A2	0
		A2	0
		A2	0
		A2	0
		A2	0
		A2	0
		A2	0
		A2	0
		A2	0
		A2	0
		A2	1
		A2	0
		A2	0
		A2	0
		A2	0
		A2	0
		A2	0
		A2	0
		A2	0
		A2	0
		A2	0
		A2	0
		A2	0
		A2	0
		A2	0
		A2	0
		A2	0
		A2	1
		A2	0
		A2	0
		A2	0
		A2	0
		A2	0
		A2	0
		A2	0
		A2	0
		A2	0
		A2	0
		A2	0
		A2	0
		A2	0
		A2	0
		A2	0
		A2	0
		A2	0
		A2	0
		A2	0
		A2	0
		A2	0
		A2	0
		A2	0
		A2	0
		A2	0
		A2	1
		A3	0
		A3	1
		A3	1
		A3	0
		A3	0
		A3	0
		A3	0
		A3	0
		A3	0
		A3	0
		A3	0
		A3	0
		A3	1
		A3	0
		A3	0
		A3	0
		A3	0
		A3	0
		A3	0
		A3	0
		A3	0
		A3	0
		A3	0
		A3	0
		A3	0
		A3	0
		A3	0
		A3	0
		A3	0
		A3	0
		A3	0
		A3	0
		A3	0
		A3	0
		A3	0
		A3	0
		A3	0
		A3	0
		A3	0
		A3	0
		A3	0
		A3	0
		A3	0
		A3	0
		A3	0
		A3	0
		A3	0
		A3	0
		A3	1
		A3	0
		A3	0
		A3	0
		A3	0
		A3	0
		A3	0
		A3	0
		A3	0
		A3	0
		A3	0
		A3	0
		A3	0
		A3	0
		A3	0
		A3	0
		A3	0
		A3	0
		A3	0
		A3	0
		A3	0
		A3	0
		A3	0
		A3	0
		A3	0
		A3	0
		A3	0
		A3	0
		A3	0
		A3	0
		A3	0
		A3	0
		A3	0
		A3	0
		A3	0
		A3	0
		A3	0
		A3	0
		A3	0
		A3	0
		A3	0
		A3	0
		A4	0
		A4	0
		A4	0
		A4	0
		A4	0
		A4	0
		A4	0
		A4	0
		A4	0
		A4	0
		A4	0
		A4	0
		A4	0
		A4	0
		A4	0
		A4	0
		A4	0
		A4	0
		A4	0
		A4	0
		A4	0
		A4	0
		A4	0
		A4	0
		A4	0
		A4	0
		A4	0
		A4	0
		A4	0
		A4	0
		A4	0
		A4	0
		A4	0
		A4	0
		A4	0
		A4	0
		A4	0
		A4	0
		A4	0
		A4	0
		A4	0
		A4	0
		A4	0
		A4	0
		A4	0
		A4	0
		A4	0
		A4	0
		A4	0
		A4	0
		A4	0
		A4	0
		A4	0
		A4	0
		A4	0
		A4	0
		A4	0
		A4	0
		A4	0
		A4	0
		A4	0
		A4	0
		A4	0
		A4	0
		A4	0
		A4	0
		A4	0
		A4	0
		A4	0
		A4	0
		A4	0
		A4	0
		A4	0
		A4	0
		A4	0
		A4	0
		A4	0
		A4	0
		A4	0
		A4	0
		A4	0
		A4	0
		A4	0
		A4	0
		A4	0
		A4	0
		A4	0
		A4	0
		A4	0
		A4	0
		2-hour	0
		2-hour	0
		2-hour	0
		2-hour	1
		2-hour	0
		2-hour	0
		2-hour	0
		2-hour	0
		2-hour	0
		2-hour	0
		2-hour	0
		2-hour	0
		2-hour	0
		2-hour	0
		2-hour	0
		2-hour	0
		2-hour	0
		2-hour	0
		2-hour	0
		2-hour	0
		2-hour	0
		2-hour	0
		2-hour	0
		2-hour	0
		2-hour	0
		2-hour	1
		2-hour	1
		2-hour	1
		2-hour	0
		2-hour	0
		2-hour	0

## Sheet: 005
		Phase	Number of Temper outbursts
		Baseline	2
		Baseline	0
		Baseline	0
		Baseline	0
		Baseline	0
		Baseline	0
		Baseline	0
		Baseline	1
		Baseline	0
		Baseline	0
		Baseline	0
		Baseline	0
		Baseline	0
		Baseline	1
		Baseline	0
		Baseline	0
		Baseline	0
		Baseline	0
		Baseline	0
		Baseline	1
		Baseline	0
		Baseline	0
		Baseline	0
		Baseline	1
		Baseline	1
		Baseline	0
		Baseline	0
		Baseline	0
		Baseline	0
		Baseline	0
		Baseline	0
		Baseline	0
		Baseline	0
		Baseline	0
		Baseline	0
		Baseline	0
		Baseline	0
		Baseline	1
		Baseline	1
		Baseline	0
		Baseline	0
		Baseline	0
		Baseline	0
		Baseline	0
		Baseline	1
		Baseline	1
		Baseline	1
		Baseline	0
		Baseline	1
		Baseline	0
		Baseline	0
		Baseline	0
		Baseline	0
		Baseline	0
		Baseline	0
		Baseline	0
		Baseline	0
		Baseline	0
		Baseline	0
		Baseline	0
		Baseline	1
		Baseline	0
		Baseline	0
		Baseline	0
		Baseline	0
		Baseline	0
		Baseline	1
		Baseline	0
		Baseline	0
		Baseline	0
		Baseline	0
		Baseline	0
		Baseline	0
		Baseline	1
		Baseline	0
		Baseline	0
		Baseline	0
		Baseline	0
		Baseline	0
		Baseline	0
		Baseline	0
		Baseline	0
		Baseline	0
		Baseline	0
		Baseline	0
		Baseline	0
		Baseline	0
		Baseline	0
		Baseline	0
		Baseline	1
		Baseline	0
		Baseline	0
		Baseline	0
		Baseline	0
		Baseline	0
		Baseline	0
		Baseline	0
		Baseline	0
		Baseline	1
		Baseline	0
		Baseline	0
		Baseline	0
		Baseline	0
		Baseline	0
		Baseline	0
		Baseline	0
		Baseline	0
		Baseline	0
		Baseline	0
		Baseline	0
		Baseline	0
		Baseline	1
		Baseline	0
		Baseline	0
		Baseline	0
		Baseline	0
		Baseline	0
		Baseline	0
		Baseline	0
		Baseline	0
		Baseline	0
		Baseline	0
		Baseline	0
		Baseline	0
		Baseline	0
		Baseline	0
		Baseline	1
		Baseline	0
		Baseline	0
		Baseline	0
		Baseline	0
		Baseline	1
		Baseline	0
		Baseline	0
		Baseline	0
		Baseline	0
		Baseline	0
		Baseline	0
		Baseline	0
		Baseline	0
		Baseline	0
		Baseline	0
		Baseline	0
		Baseline	1
		Baseline	0
		Baseline	0
		Baseline	1
		Baseline	1
		Baseline	0
		Baseline	0
		Baseline	0
		Baseline	0
		Baseline	1
		Baseline	0
		Baseline	0
		Baseline	1
		Baseline	0
		Baseline	0
		Baseline	0
		Baseline	0
		Baseline	1
		Baseline	0
		Baseline	0
		Baseline	0
		Baseline	0
		Baseline	0
		Baseline	0
		Baseline	0
		Baseline	0
		Baseline	0
		Baseline	0
		Baseline	0
		Baseline	0
		Baseline	0
		Baseline	0
		Baseline	0
		Baseline	0
		Baseline	1
		Baseline	0
		Baseline	0
		Baseline	0
		Baseline	0
		Baseline	0
		Baseline	0
		Baseline	0
		Baseline	0
		Baseline	0
		Baseline	0
		Baseline	0
		Baseline	0
		Baseline	0
		Baseline	0
		Baseline	0
		Baseline	0
		Baseline	0
		Baseline	0
		Baseline	0
		Baseline	0
		Baseline	0
		Baseline	0
		Baseline	0
		Baseline	0
		Baseline	0
		Baseline	0
		Baseline	0
		Baseline	1
		Baseline	0
		Baseline	0
		Baseline	0
		Baseline	0
		Baseline	0
		Baseline	0
		Baseline	0
		Baseline	0
		Baseline	0
		Baseline	0
		Baseline	0
		Baseline	0
		Baseline	0
		Baseline	1
		Baseline	0
		Baseline	0
		Baseline	1
		Baseline	0
		Baseline	1
		Baseline	0
		Baseline	0
		Baseline	0
		Baseline	0
		Baseline	0
		Baseline	0
		Baseline	0
		Baseline	0
		Baseline	0
		Baseline	0
		Baseline	0
		Baseline	1
		Baseline	0
		Baseline	0
		Baseline	0
		Baseline	0
		Baseline	0
		Baseline	0
		Baseline	0
		Baseline	0
		Baseline	0
		Baseline	0
		Baseline	0
		Baseline	0
		Baseline	0
		Baseline	0
		Baseline	0
		Baseline	0
		Baseline	0
		Baseline	0
		Baseline	0
		Baseline	0
		Baseline	0
		Baseline	0
		Baseline	1
		Baseline	0
		Baseline	0
		Baseline	0
		Baseline	0
		Baseline	0
		Baseline	0
		Baseline	1
		Baseline	0
		Baseline	0
		Baseline	0
		Baseline	0
		Baseline	0
		Baseline	0
		Baseline	0
		Baseline	0
		Baseline	0
		Baseline	0
		Baseline	0
		Baseline	0
		Baseline	0
		Baseline	0
		Baseline	0
		Baseline	0
		Baseline	0
		Baseline	0
		Baseline	0
		Baseline	0
		Baseline	0
		Baseline	0
		Baseline	0
		Baseline	0
		Baseline	0
		Baseline	0
		Baseline	0
		Baseline	0
		Baseline	0
		Baseline	0
		Baseline	0
		Baseline	0
		Baseline	0
		Baseline	0
		Baseline	0
		Baseline	0
		Baseline	0
		Baseline	0
		Baseline	0
		A1	1
		A1	0
		A1	0
		A1	0
		A1	0
		A1	0
		A1	0
		A1	1
		A1	0
		A1	0
		A1	0
		A1	0
		A1	0
		A1	0
		A1	0
		A1	0
		A1	0
		A1	0
		A1	1
		A1	1
		A1	0
		A1	1
		A1	0
		A1	0
		A1	0
		A1	0
		A1	0
		A1	0
		A1	0
		A1	0
		A1	0
		A1	0
		A1	0
		A1	0
		A1	0
		A1	0
		A1	0
		A1	0
		A1	0
		A1	0
		A1	0
		A1	0
		A1	0
		A1	0
		A1	0
		A1	0
		A1	0
		A1	0
		A1	0
		A1	0
		A1	0
		A1	0
		A1	0
		A1	0
		A1	0
		A1	0
		A1	0
		A1	0
		A1	0
		A1	0
		A1	1
		A1	0
		A1	0
		A1	0
		A1	0
		A1	0
		A1	0
		A1	0
		A1	0
		A1	0
		A1	0
		A1	0
		A1	0
		A1	0
		A1	0
		A1	0
		A1	0
		A1	0
		A1	0
		A1	0
		A1	0
		A1	0
		A1	0
		A1	0
		A1	1
		A1	0
		A1	0
		A1	1
		A1	0
		A1	0
		A2	0
		A2	0
		A2	0
		A2	0
		A2	0
		A2	0
		A2	1
		A2	0
		A2	0
		A2	0
		A2	0
		A2	0
		A2	0
		A2	0
		A2	0
		A2	0
		A2	0
		A2	0
		A2	0
		A2	0
		A2	0
		A2	0
		A2	0
		A2	0
		A2	0
		A2	0
		A2	0
		A2	0
		A2	0
		A2	1
		A2	0
		A2	0
		A2	0
		A2	0
		A2	0
		A2	0
		A2	0
		A2	0
		A2	1
		A2	0
		A2	0
		A2	0
		A2	0
		A2	0
		A2	0
		A2	0
		A2	0
		A2	1
		A2	0
		A2	0
		A2	0
		A2	0
		A2	0
		A2	0
		A2	0
		A2	0
		A2	0
		A2	0
		A2	0
		A2	0
		A2	0
		A2	0
		A2	0
		A2	0
		A2	1
		A2	0
		A2	1
		A2	0
		A2	0
		A2	0
		A2	0
		A2	0
		A2	0
		A2	0
		A2	0
		A2	0
		A2	0
		A2	1
		A2	0
		A2	0
		A2	0
		A2	0
		A2	0
		A2	0
		A2	0
		A2	0
		A2	0
		A2	0
		A2	0
		A2	0
		A3	0
		A3	0
		A3	0
		A3	0
		A3	0
		A3	0
		A3	0
		A3	0
		A3	0
		A3	0
		A3	0
		A3	0
		A3	0
		A3	1
		A3	0
		A3	0
		A3	0
		A3	0
		A3	0
		A3	0
		A3	0
		A3	0
		A3	0
		A3	0
		A3	0
		A3	0
		A3	0
		A3	0
		A3	0
		A3	0
		A3	0
		A3	0
		A3	0
		A3	0
		A3	0
		A3	0
		A3	0
		A3	0
		A3	0
		A3	0
		A3	0
		A3	0
		A3	0
		A3	0
		A3	0
		A3	0
		A3	0
		A3	0
		A3	0
		A3	0
		A3	0
		A3	0
		A3	0
		A3	1
		A3	0
		A3	0
		A3	0
		A3	0
		A3	0
		A3	0
		A3	0
		A3	0
		A3	0
		A3	1
		A3	0
		A3	0
		A3	0
		A3	0
		A3	0
		A3	0
		A3	0
		A3	0
		A3	0
		A3	0
		A3	0
		A3	0
		A3	0
		A3	0
		A3	0
		A3	0
		A3	0
		A3	0
		A3	0
		A3	0
		A3	0
		A3	0
		A3	0
		A3	0
		A3	0
		A3	0
		A4	0
		A4	0
		A4	0
		A4	0
		A4	0
		A4	0
		A4	0
		A4	0
		A4	0
		A4	0
		A4	0
		A4	0
		A4	0
		A4	0
		A4	0
		A4	0
		A4	0
		A4	0
		A4	0
		A4	0
		A4	0
		A4	0
		A4	0
		A4	0
		A4	0
		A4	0
		A4	0
		A4	0
		A4	0
		A4	0
		A4	0
		A4	0
		A4	0
		A4	0
		A4	0
		A4	0
		A4	0
		A4	0
		A4	0
		A4	0
		A4	0
		A4	0
		A4	0
		A4	0
		A4	0
		A4	0
		A4	0
		A4	0
		A4	0
		A4	0
		A4	0
		A4	0
		A4	0
		A4	0
		A4	0
		A4	0
		A4	0
		A4	0
		A4	0
		A4	0
		A4	0
		A4	0
		A4	0
		A4	0
		A4	0
		A4	0
		A4	0
		A4	0
		A4	0
		A4	0
		A4	0
		A4	0
		A4	0
		A4	0
		A4	0
		A4	0
		A4	0
		A4	0
		A4	0
		A4	0
		A4	0
		A4	0
		A4	0
		A4	0
		A4	0
		A4	0
		A4	0
		A4	0
		A4	0
		A4	1
		2-hour	0
		2-hour	0
		2-hour	0
		2-hour	0
		2-hour	1
		2-hour	0
		2-hour	0
		2-hour	0
		2-hour	0
		2-hour	0
		2-hour	0
		2-hour	0
		2-hour	0
		2-hour	0
		2-hour	0
		2-hour	0
		2-hour	0
		2-hour	1
		2-hour	1
		2-hour	0
		2-hour	0
		2-hour	0
		2-hour	0
		2-hour	0
		2-hour	0
		2-hour	1
		2-hour	0
		2-hour	1
		2-hour	0
		2-hour	0
		2-hour	0

## Sheet: 009
		Phase	Number of Temper outbursts
		Baseline	0
		Baseline	0
		Baseline	0
		Baseline	0
		Baseline	0
		Baseline	0
		Baseline	0
		Baseline	0
		Baseline	0
		Baseline	0
		Baseline	0
		Baseline	0
		Baseline	0
		Baseline	1
		Baseline	0
		Baseline	0
		Baseline	0
		Baseline	0
		Baseline	0
		Baseline	0
		Baseline	0
		Baseline	0
		Baseline	0
		Baseline	0
		Baseline	0
		Baseline	0
		Baseline	1
		Baseline	0
		Baseline	0
		Baseline	0
		Baseline	0
		Baseline	0
		Baseline	0
		Baseline	0
		Baseline	0
		Baseline	1
		Baseline	0
		Baseline	0
		Baseline	0
		Baseline	0
		Baseline	0
		Baseline	0
		Baseline	0
		Baseline	0
		Baseline	0
		Baseline	0
		Baseline	0
		Baseline	0
		Baseline	1
		Baseline	1
		Baseline	0
		Baseline	0
		Baseline	0
		Baseline	0
		Baseline	0
		Baseline	0
		Baseline	0
		Baseline	0
		Baseline	0
		Baseline	0
		Baseline	0
		Baseline	0
		Baseline	0
		Baseline	0
		Baseline	1
		Baseline	0
		Baseline	0
		Baseline	0
		Baseline	0
		Baseline	0
		Baseline	0
		Baseline	0
		Baseline	0
		Baseline	0
		Baseline	0
		Baseline	0
		Baseline	0
		Baseline	0
		Baseline	0
		Baseline	0
		Baseline	0
		Baseline	0
		Baseline	0
		Baseline	0
		Baseline	0
		Baseline	0
		Baseline	0
		Baseline	0
		Baseline	0
		Baseline	0
		Baseline	0
		Baseline	1
		Baseline	1
		Baseline	0
		Baseline	0
		Baseline	1
		Baseline	0
		Baseline	0
		Baseline	0
		Baseline	1
		Baseline	0
		Baseline	0
		Baseline	0
		Baseline	0
		Baseline	0
		Baseline	0
		Baseline	0
		Baseline	0
		Baseline	0
		Baseline	0
		Baseline	0
		Baseline	0
		Baseline	0
		Baseline	0
		Baseline	0
		Baseline	0
		Baseline	0
		Baseline	0
		Baseline	0
		Baseline	0
		Baseline	0
		Baseline	0
		Baseline	0
		Baseline	0
		Baseline	0
		Baseline	0
		Baseline	0
		Baseline	0
		Baseline	0
		Baseline	1
		Baseline	0
		Baseline	0
		Baseline	1
		Baseline	0
		Baseline	0
		Baseline	0
		Baseline	0
		Baseline	0
		Baseline	0
		Baseline	0
		Baseline	0
		Baseline	1
		Baseline	0
		Baseline	0
		Baseline	0
		Baseline	1
		Baseline	0
		Baseline	1
		Baseline	0
		A1	0
		A1	0
		A1	0
		A1	0
		A1	0
		A1	0
		A1	0
		A1	0
		A1	0
		A1	0
		A1	0
		A1	0
		A1	0
		A1	0
		A1	1
		A1	1
		A1	0
		A1	0
		A1	0
		A1	0
		A1	0
		A1	0
		A1	0
		A1	2
		A1	1
		A1	0
		A1	0
		A1	0
		A1	0
		A1	1
		A1	0
		A1	1
		A1	0
		A1	0
		A1	3
		A1	0
		A1	0
		A1	0
		A1	0
		A1	0
		A1	0
		A1	0
		A1	0
		A1	0
		A1	0
		A1	0
		A1	0
		A1	0
		A1	0
		A1	0
		A1	1
		A1	0
		A1	0
		A1	0
		A1	0
		A1	0
		A1	0
		A1	0
		A1	0
		A1	0
		A1	0
		A1	0
		A1	0
		A1	0
		A1	0
		A1	0
		A1	0
		A1	0
		A1	0
		A1	0
		A1	0
		A1	0
		A1	0
		A1	0
		A1	0
		A1	1
		A1	0
		A1	0
		A1	0
		A1	0
		A1	0
		A1	0
		A1	0
		A1	0
		A1	0
		A1	0
		A1	0
		A1	0
		A1	0
		A1	0
		A2	0
		A2	0
		A2	0
		A2	0
		A2	1
		A2	0
		A2	0
		A2	2
		A2	0
		A2	0
		A2	0
		A2	0
		A2	0
		A2	0
		A2	0
		A2	0
		A2	0
		A2	0
		A2	0
		A2	0
		A2	0
		A2	1
		A2	0
		A2	0
		A2	0
		A2	0
		A2	0
		A2	0
		A2	0
		A2	0
		A2	0
		A2	0
		A2	0
		A2	0
		A2	0
		A2	0
		A2	0
		A2	0
		A2	0
		A2	0
		A2	0
		A2	0
		A2	0
		A2	0
		A2	0
		A2	0
		A2	1
		A2	0
		A2	0
		A2	0
		A2	0
		A2	0
		A2	0
		A2	0
		A2	0
		A2	0
		A2	0
		A2	0
		A2	0
		A2	0
		A2	0
		A2	1
		A2	1
		A2	0
		A2	0
		A2	0
		A2	0
		A2	0
		A2	0
		A2	0
		A2	0
		A2	0
		A2	0
		A2	0
		A2	0
		A2	0
		A2	0
		A2	0
		A2	0
		A2	0
		A2	0
		A2	0
		A2	1
		A2	0
		A2	0
		A2	0
		A2	0
		A2	0
		A2	0
		A2	1
		A3	2
		A3	0
		A3	0
		A3	1
		A3	0
		A3	0
		A3	1
		A3	0
		A3	0
		A3	0
		A3	0
		A3	0
		A3	0
		A3	1
		A3	0
		A3	0
		A3	0
		A3	0
		A3	0
		A3	0
		A3	0
		A3	0
		A3	0
		A3	0
		A3	0
		A3	0
		A3	0
		A3	0
		A3	0
		A3	0
		A3	0
		A3	1
		A3	0
		A3	0
		A3	0
		A3	0
		A3	0
		A3	0
		A3	0
		A3	0
		A3	0
		A3	0
		A3	0
		A3	0
		A3	0
		A3	0
		A3	0
		A3	0
		A3	0
		A3	0
		A3	0
		A3	0
		A3	0
		A3	0
		A3	1
		A3	0
		A3	0
		A3	1
		A3	0
		A3	0
		A3	0
		A3	0
		A3	0
		A3	1
		A3	0
		A3	0
		A3	0
		A3	0
		A3	0
		A3	0
		A3	0
		A3	0
		A3	0
		A3	0
		A3	0
		A3	0
		A3	1
		A3	1
		A3	0
		A3	0
		A3	0
		A3	0
		A3	0
		A3	1
		A3	0
		A3	0
		A3	1
		A3	0
		A3	0
		A3	0
		A4	0
		A4	0
		A4	0
		A4	0
		A4	0
		A4	0
		A4	0
		A4	0
		A4	0
		A4	0
		A4	0
		A4	0
		A4	1
		A4	2
		A4	0
		A4	0
		A4	0
		A4	0
		A4	0
		A4	0
		A4	0
		A4	0
		A4	0
		A4	0
		A4	1
		A4	0
		A4	0
		A4	0
		A4	0
		A4	0
		A4	0
		A4	0
		A4	0
		A4	0
		A4	0
		A4	0
		A4	0
		A4	0
		A4	0
		A4	0
		A4	0
		A4	0
		A4	1
		A4	1
		A4	0
		A4	0
		A4	0
		A4	0
		A4	0
		A4	0
		A4	1
		A4	0
		A4	0
		A4	0
		A4	0
		A4	0
		A4	0
		A4	0
		A4	0
		A4	0
		A4	0
		A4	0
		A4	0
		A4	0
		A4	0
		A4	0
		A4	0
		A4	0
		A4	0
		A4	0
		A4	0
		A4	0
		A4	0
		A4	0
		A4	0
		A4	0
		A4	0
		A4	0
		A4	0
		A4	0
		A4	0
		A4	0
		A4	0
		A4	0
		A4	0
		A4	0
		A4	0
		A4	0
		A4	0
		A4	0
		2-hour	1
		2-hour	0
		2-hour	0
		2-hour	0
		2-hour	0
		2-hour	1
		2-hour	0
		2-hour	0
		2-hour	0
		2-hour	0
		2-hour	0
		2-hour	0
		2-hour	1
		2-hour	0
		2-hour	0
		2-hour	0
		2-hour	0
		2-hour	0
		2-hour	0
		2-hour	0
		2-hour	1
		2-hour	0
		2-hour	0
		2-hour	1
		2-hour	0
		2-hour	0
		2-hour	0
		2-hour	0
		2-hour	0
		2-hour	0
		2-hour	0

## Sheet: 010
		Phase	Number of Temper outbursts
		Baseline	1
		Baseline	0
		Baseline	1
		Baseline	1
		Baseline	1
		Baseline	0
		Baseline	0
		Baseline	0
		Baseline	0
		Baseline	0
		Baseline	0
		Baseline	1
		Baseline	1
		Baseline	0
		Baseline	0
		Baseline	0
		Baseline	0
		Baseline	0
		Baseline	0
		Baseline	0
		Baseline	0
		Baseline	0
		Baseline	0
		Baseline	0
		Baseline	0
		Baseline	0
		Baseline	0
		Baseline	0
		Baseline	0
		Baseline	0
		Baseline	0
		Baseline	0
		Baseline	0
		Baseline	0
		Baseline	0
		Baseline	0
		Baseline	0
		Baseline	0
		Baseline	0
		Baseline	0
		Baseline	1
		Baseline	0
		Baseline	0
		Baseline	0
		Baseline	0
		Baseline	0
		Baseline	0
		Baseline	0
		Baseline	0
		Baseline	0
		Baseline	0
		Baseline	0
		Baseline	0
		Baseline	0
		Baseline	0
		Baseline	0
		Baseline	0
		Baseline	0
		Baseline	1
		Baseline	0
		Baseline	0
		Baseline	0
		Baseline	0
		Baseline	0
		Baseline	0
		Baseline	0
		Baseline	0
		Baseline	0
		Baseline	0
		Baseline	0
		Baseline	0
		Baseline	0
		Baseline	0
		Baseline	0
		Baseline	0
		Baseline	0
		Baseline	0
		Baseline	0
		Baseline	0
		Baseline	1
		Baseline	0
		Baseline	1
		Baseline	1
		Baseline	0
		Baseline	0
		Baseline	0
		Baseline	0
		Baseline	0
		Baseline	0
		Baseline	0
		Baseline	1
		Baseline	0
		Baseline	0
		Baseline	0
		Baseline	0
		Baseline	0
		Baseline	1
		Baseline	0
		Baseline	0
		Baseline	0
		Baseline	0
		Baseline	0
		Baseline	0
		Baseline	0
		Baseline	0
		Baseline	0
		Baseline	0
		Baseline	0
		Baseline	0
		Baseline	0
		Baseline	0
		Baseline	0
		Baseline	0
		Baseline	0
		Baseline	0
		Baseline	2
		Baseline	0
		Baseline	0
		Baseline	0
		Baseline	0
		Baseline	0
		Baseline	0
		Baseline	0
		Baseline	0
		Baseline	0
		Baseline	1
		Baseline	0
		Baseline	0
		Baseline	0
		Baseline	0
		Baseline	0
		Baseline	0
		Baseline	0
		Baseline	0
		Baseline	0
		Baseline	1
		Baseline	0
		Baseline	0
		Baseline	0
		Baseline	0
		Baseline	0
		Baseline	0
		Baseline	0
		Baseline	0
		Baseline	1
		Baseline	0
		Baseline	0
		Baseline	0
		Baseline	0
		Baseline	0
		Baseline	0
		Baseline	0
		Baseline	0
		Baseline	0
		Baseline	1
		Baseline	0
		Baseline	0
		Baseline	0
		Baseline	1
		Baseline	0
		Baseline	0
		A1	0
		A1	0
		A1	0
		A1	0
		A1	0
		A1	0
		A1	0
		A1	0
		A1	0
		A1	0
		A1	2
		A1	0
		A1	0
		A1	0
		A1	0
		A1	0
		A1	0
		A1	0
		A1	0
		A1	0
		A1	0
		A1	0
		A1	0
		A1	1
		A1	0
		A1	0
		A1	0
		A1	0
		A1	0
		A1	0
		A1	0
		A1	1
		A1	0
		A1	0
		A1	0
		A1	0
		A1	0
		A1	0
		A1	0
		A1	0
		A1	0
		A1	0
		A1	0
		A1	0
		A1	0
		A1	0
		A1	0
		A1	0
		A1	0
		A1	0
		A1	0
		A1	0
		A1	0
		A1	0
		A1	0
		A1	1
		A1	0
		A1	0
		A1	0
		A1	0
		A1	0
		A1	0
		A1	0
		A1	0
		A1	0
		A1	0
		A1	0
		A1	0
		A1	0
		A1	0
		A1	0
		A1	0
		A1	0
		A1	0
		A1	0
		A1	0
		A1	0
		A1	0
		A1	0
		A1	0
		A1	0
		A1	0
		A1	0
		A1	0
		A1	0
		A1	0
		A1	0
		A1	0
		A1	0
		A1	0
		A2	0
		A2	0
		A2	0
		A2	0
		A2	0
		A2	0
		A2	0
		A2	1
		A2	0
		A2	0
		A2	0
		A2	0
		A2	0
		A2	0
		A2	0
		A2	1
		A2	0
		A2	0
		A2	0
		A2	0
		A2	0
		A2	0
		A2	0
		A2	0
		A2	0
		A2	0
		A2	0
		A2	0
		A2	0
		A2	0
		A2	0
		A2	0
		A2	0
		A2	0
		A2	0
		A2	0
		A2	0
		A2	0
		A2	0
		A2	0
		A2	0
		A2	0
		A2	0
		A2	0
		A2	0
		A2	0
		A2	0
		A2	0
		A2	0
		A2	0
		A2	0
		A2	0
		A2	0
		A2	0
		A2	0
		A2	0
		A2	0
		A2	0
		A2	0
		A2	0
		A2	1
		A2	0
		A2	0
		A2	0
		A2	0
		A2	0
		A2	0
		A2	0
		A2	0
		A2	0
		A2	0
		A2	1
		A2	0
		A2	0
		A2	0
		A2	0
		A2	0
		A2	0
		A2	0
		A2	0
		A2	1
		A2	0
		A2	0
		A2	0
		A2	0
		A2	1
		A2	0
		A2	0
		A2	0
		A2	0
		A3	0
		A3	0
		A3	0
		A3	0
		A3	0
		A3	0
		A3	0
		A3	0
		A3	0
		A3	0
		A3	0
		A3	0
		A3	0
		A3	0
		A3	0
		A3	0
		A3	0
		A3	0
		A3	0
		A3	0
		A3	0
		A3	0
		A3	0
		A3	0
		A3	0
		A3	0
		A3	0
		A3	0
		A3	0
		A3	0
		A3	0
		A3	0
		A3	0
		A3	0
		A3	0
		A3	0
		A3	0
		A3	0
		A3	0
		A3	0
		A3	1
		A3	0
		A3	0
		A3	0
		A3	0
		A3	0
		A3	0
		A3	0
		A3	0
		A3	0
		A3	0
		A3	0
		A3	0
		A3	0
		A3	0
		A3	0
		A3	0
		A3	0
		A3	0
		A3	0
		A3	0
		A3	0
		A3	0
		A3	0
		A3	0
		A3	0
		A3	0
		A3	0
		A3	0
		A3	0
		A3	1
		A3	0
		A3	0
		A3	0
		A3	0
		A3	0
		A3	0
		A3	0
		A3	0
		A3	0
		A3	0
		A3	0
		A3	0
		A3	0
		A3	0
		A3	0
		A3	0
		A3	1
		A3	0
		A3	0
		A4	0
		A4	0
		A4	0
		A4	0
		A4	0
		A4	0
		A4	0
		A4	0
		A4	0
		A4	0
		A4	0
		A4	0
		A4	0
		A4	0
		A4	0
		A4	0
		A4	0
		A4	0
		A4	0
		A4	0
		A4	0
		A4	0
		A4	0
		A4	0
		A4	0
		A4	0
		A4	0
		A4	0
		A4	0
		A4	0
		A4	0
		A4	0
		A4	0
		A4	0
		A4	0
		A4	0
		A4	0
		A4	0
		A4	0
		A4	0
		A4	0
		A4	0
		A4	0
		A4	0
		A4	0
		A4	0
		A4	0
		A4	0
		A4	0
		A4	0
		A4	0
		A4	0
		A4	0
		A4	0
		A4	0
		A4	0
		A4	0
		A4	0
		A4	0
		A4	0
		A4	0
		A4	0
		A4	0
		A4	0
		A4	0
		A4	0
		A4	0
		A4	0
		A4	0
		A4	1
		A4	0
		A4	0
		A4	0
		A4	0
		A4	0
		A4	0
		A4	0
		A4	0
		A4	0
		A4	0
		A4	0
		A4	0
		A4	0
		A4	0
		A4	0
		A4	0
		A4	0
		A4	0
		A4	0
		A4	0
		2-hour	0
		2-hour	0
		2-hour	0
		2-hour	0
		2-hour	0
		2-hour	0
		2-hour	0
		2-hour	0
		2-hour	0
		2-hour	0
		2-hour	0
		2-hour	0
		2-hour	0
		2-hour	1
		2-hour	0
		2-hour	0
		2-hour	0
		2-hour	0
		2-hour	0
		2-hour	0
		2-hour	0
		2-hour	0
		2-hour	0
		2-hour	0
		2-hour	0
		2-hour	0
		2-hour	0

## Sheet: 011
		Phase	Number of Temper outbursts
		Baseline	1
		Baseline	1
		Baseline	1
		Baseline	0
		Baseline	0
		Baseline	0
		Baseline	0
		Baseline	0
		Baseline	0
		Baseline	0
		Baseline	0
		Baseline	0
		Baseline	0
		Baseline	0
		Baseline	0
		Baseline	0
		Baseline	0
		Baseline	0
		Baseline	0
		Baseline	0
		Baseline	1
		Baseline	1
		Baseline	0
		Baseline	0
		Baseline	0
		Baseline	0
		Baseline	0
		Baseline	0
		Baseline	0
		Baseline	0
		Baseline	1
		Baseline	0
		Baseline	0
		Baseline	0
		Baseline	1
		Baseline	0
		Baseline	0
		Baseline	1
		Baseline	0
		Baseline	0
		Baseline	0
		Baseline	1
		Baseline	1
		Baseline	1
		Baseline	0
		Baseline	0
		Baseline	0
		Baseline	0
		Baseline	0
		Baseline	0
		Baseline	0
		Baseline	0
		Baseline	0
		Baseline	1
		Baseline	1
		Baseline	0
		Baseline	1
		Baseline	1
		Baseline	1
		Baseline	1
		Baseline	1
		Baseline	0
		Baseline	0
		Baseline	1
		Baseline	1
		Baseline	0
		Baseline	0
		Baseline	0
		Baseline	1
		Baseline	0
		Baseline	0
		Baseline	1
		Baseline	0
		Baseline	0
		Baseline	0
		Baseline	0
		Baseline	0
		Baseline	1
		Baseline	1
		Baseline	0
		Baseline	0
		Baseline	0
		Baseline	0
		Baseline	0
		Baseline	0
		Baseline	1
		Baseline	0
		Baseline	0
		Baseline	0
		Baseline	0
		Baseline	0
		Baseline	0
		Baseline	0
		Baseline	0
		Baseline	0
		Baseline	0
		Baseline	0
		Baseline	0
		Baseline	0
		Baseline	0
		Baseline	0
		Baseline	0
		Baseline	0
		Baseline	0
		Baseline	0
		Baseline	0
		Baseline	0
		Baseline	0
		Baseline	0
		Baseline	0
		Baseline	0
		Baseline	1
		Baseline	0
		Baseline	0
		Baseline	0
		Baseline	1
		Baseline	0
		Baseline	0
		Baseline	0
		Baseline	0
		Baseline	0
		Baseline	0
		Baseline	0
		Baseline	0
		Baseline	0
		Baseline	0
		Baseline	0
		Baseline	0
		Baseline	0
		Baseline	0
		Baseline	0
		Baseline	0
		Baseline	0
		Baseline	1
		Baseline	0
		Baseline	0
		Baseline	0
		Baseline	0
		Baseline	0
		Baseline	0
		Baseline	0
		Baseline	0
		Baseline	1
		Baseline	0
		Baseline	0
		Baseline	0
		Baseline	0
		Baseline	0
		Baseline	1
		Baseline	0
		Baseline	0
		Baseline	0
		Baseline	0
		Baseline	1
		Baseline	0
		A1	0
		A1	0
		A1	0
		A1	0
		A1	1
		A1	1
		A1	0
		A1	0
		A1	0
		A1	1
		A1	1
		A1	1
		A1	1
		A1	1
		A1	0
		A1	0
		A1	0
		A1	0
		A1	0
		A1	0
		A1	1
		A1	1
		A1	0
		A1	0
		A1	0
		A1	0
		A1	1
		A1	1
		A1	0
		A1	0
		A1	0
		A1	0
		A1	0
		A1	0
		A1	0
		A1	0
		A1	1
		A1	0
		A1	0
		A1	0
		A1	0
		A1	0
		A1	0
		A1	0
		A1	0
		A1	0
		A1	0
		A1	0
		A1	0
		A1	0
		A1	0
		A1	1
		A1	0
		A1	0
		A1	0
		A1	1
		A1	0
		A1	0
		A1	0
		A1	0
		A1	1
		A1	1
		A1	0
		A1	0
		A1	1
		A1	0
		A1	0
		A1	0
		A1	0
		A1	0
		A1	1
		A1	0
		A1	0
		A1	0
		A1	1
		A1	0
		A1	0
		A1	0
		A1	0
		A1	0
		A1	1
		A1	0
		A1	0
		A1	0
		A1	0
		A1	0
		A1	0
		A1	0
		A1	0
		A1	0
		A2	1
		A2	0
		A2	0
		A2	0
		A2	0
		A2	0
		A2	0
		A2	0
		A2	0
		A2	0
		A2	0
		A2	0
		A2	0
		A2	0
		A2	2
		A2	0
		A2	0
		A2	1
		A2	0
		A2	0
		A2	0
		A2	0
		A2	0
		A2	0
		A2	0
		A2	0
		A2	0
		A2	0
		A2	0
		A2	0
		A2	0
		A2	0
		A2	0
		A2	0
		A2	0
		A2	0
		A2	0
		A2	0
		A2	0
		A2	0
		A2	0
		A2	0
		A2	1
		A2	0
		A2	1
		A2	0
		A2	0
		A2	0
		A2	0
		A2	0
		A2	0
		A2	0
		A2	0
		A2	0
		A2	0
		A2	1
		A2	1
		A2	0
		A2	0
		A2	0
		A2	1
		A2	0
		A2	0
		A2	0
		A2	1
		A2	0
		A2	0
		A2	0
		A2	0
		A2	0
		A2	1
		A2	0
		A2	0
		A2	0
		A2	0
		A2	1
		A2	0
		A2	0
		A2	0
		A2	0
		A2	1
		A2	1
		A2	0
		A2	0
		A2	1
		A2	0
		A2	0
		A2	0
		A2	0
		A2	1
		A3	0
		A3	0
		A3	0
		A3	0
		A3	0
		A3	0
		A3	0
		A3	1
		A3	1
		A3	0
		A3	0
		A3	0
		A3	0
		A3	0
		A3	1
		A3	0
		A3	0
		A3	0
		A3	0
		A3	0
		A3	0
		A3	0
		A3	0
		A3	0
		A3	0
		A3	0
		A3	0
		A3	0
		A3	0
		A3	0
		A3	0
		A3	0
		A3	0
		A3	0
		A3	0
		A3	0
		A3	0
		A3	0
		A3	0
		A3	0
		A3	0
		A3	0
		A3	0
		A3	0
		A3	0
		A3	0
		A3	0
		A3	0
		A3	0
		A3	0
		A3	0
		A3	0
		A3	0
		A3	1
		A3	1
		A3	0
		A3	1
		A3	0
		A3	0
		A3	0
		A3	0
		A3	0
		A3	0
		A3	0
		A3	0
		A3	0
		A3	0
		A3	0
		A3	0
		A3	0
		A3	0
		A3	0
		A3	0
		A3	0
		A3	0
		A3	0
		A3	0
		A3	0
		A3	0
		A3	0
		A3	0
		A3	0
		A3	1
		A3	1
		A3	1
		A3	1
		A3	1
		A3	1
		A3	1
		A3	0
		A4	0
		A4	1
		A4	1
		A4	0
		A4	0
		A4	0
		A4	0
		A4	0
		A4	0
		A4	0
		A4	0
		A4	0
		A4	0
		A4	0
		A4	0
		A4	0
		A4	0
		A4	0
		A4	0
		A4	0
		A4	0
		A4	0
		A4	0
		A4	0
		A4	1
		A4	0
		A4	0
		A4	0
		A4	0
		A4	0
		A4	0
		A4	0
		A4	0
		A4	0
		A4	0
		A4	0
		A4	0
		A4	0
		A4	0
		A4	0
		A4	0
		A4	0
		A4	0
		A4	0
		A4	0
		A4	0
		A4	0
		A4	0
		A4	0
		A4	0
		A4	0
		A4	0
		A4	0
		A4	0
		A4	0
		A4	0
		A4	0
		A4	0
		A4	0
		A4	0
		A4	0
		A4	0
		A4	1
		A4	0
		A4	0
		A4	0
		A4	0
		A4	0
		A4	0
		A4	1
		A4	0
		A4	0
		A4	0
		A4	0
		A4	0
		A4	0
		A4	0
		A4	0
		A4	0
		A4	0
		A4	0
		A4	0
		A4	0
		A4	0
		A4	0
		A4	0
		2-hour	0
		2-hour	0
		2-hour	0
		2-hour	1
		2-hour	0
		2-hour	0
		2-hour	0
		2-hour	0
		2-hour	0
		2-hour	0
		2-hour	0
		2-hour	0
		2-hour	0
		2-hour	0
		2-hour	0
		2-hour	0
		2-hour	0
		2-hour	0
		2-hour	0
		2-hour	0
		2-hour	0
		2-hour	0
		2-hour	0
		2-hour	0
		2-hour	0
		2-hour	0
		2-hour	1
		2-hour	0
		2-hour	0
		2-hour	0
		2-hour	0
